# Supplementary material
Source: PubMed Central journal article supplement (PMC10842368)
Supplement: NIHMS1938358-supplement-Supplemental_Table.pdf [file NIHMS1938358-supplement-Supplemental_Table.pdf]

## SUPPLEMENTAL MATERIAL

**Supplemental Table. Correlation of selected immune markers with high-sensitivity C-reactive protein, interleukin 6, and tumor necrosis factor alpha.**

| <b>Selected immune marker*</b> | <b>hs-CRP<br/>r (p-value)</b> | <b>IL-6<br/>r (p-value)</b> | <b>TNF-alpha<br/>r (p-value)</b> |
|--------------------------------|-------------------------------|-----------------------------|----------------------------------|
| CXCL9                          | 0.06 (0.12)                   | 0.02 (0.54)                 | 0.09 (0.002)                     |
| HGF                            | 0.09 (0.03)                   | 0.45 (<0.001)               | 0.62 (<0.001)                    |
| Resistin                       | -0.02 (0.54)                  | -0.31 (<0.001)              | -0.18 (<0.001)                   |
| SCF                            | 0.06 (0.17)                   | 0.45 (<0.001)               | 0.48 (<0.001)                    |
| VEGF-A                         | 0.10 (0.01)                   | 0.31 (<0.001)               | 0.28 (<0.001)                    |

CXCL = C-X-C motif chemokine ligand; HGF = hepatocyte growth factor; SCF = stem cell factor; VEGF = vascular endothelial growth factor; hs-CRP = high-sensitivity C-reactive protein; IL-6 = interleukin 6; TNF-alpha = tumor necrosis factor alpha

\*Immune markers were log 2 transformed and standardized.
